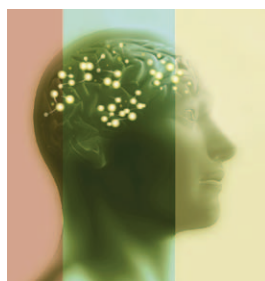

## ON THE COVER:

New techniques in functional brain imaging are adding to our understanding of the mechanisms by which general anesthetics produce loss of consciousness. In this issue of ANESTHESIOLOGY, three original research articles suggest common themes across a variety of states (sleep, anesthesia), anesthetics (sevoflurane, propofol, ketamine), and species (rats and humans): a loss of the functional connectivity among specific regions of the brain. Three accompanying Editorial Views place these new findings in the broader context of our evolving understanding of the mechanisms of general anesthetics.

- Pal *et al.*: Neural Correlates of Wakefulness, Sleep, and General Anesthesia: An Experimental Study in Rat, p. 929
- Bonhomme *et al.*: Resting-state Network-specific Breakdown of Functional Connectivity during Ketamine Alteration of Consciousness in Volunteers, p. 873
- Ranft *et al.*: Neural Correlates of Sevoflurane-induced Unconsciousness Identified by Simultaneous Functional Magnetic Resonance Imaging and Electroencephalography, p. 861
- Sleight: Another Brick in (Some Kind of) Wall, p. 827
- Mashour: Network-level Mechanisms of Ketamine Anesthesia, p. 830
- Hudson and Pryor: Integration and Information: Anesthesia Unconsciousness Finds a New Bandwidth, p. 832

|                                                                                                                             |     |
|-----------------------------------------------------------------------------------------------------------------------------|-----|
| ◆ THIS MONTH IN ANESTHESIOLOGY                                                                                              | 1A  |
| ■ SCIENCE, MEDICINE, AND THE ANESTHESIOLOGIST                                                                               | 15A |
| ■ INFOGRAPHICS IN ANESTHESIOLOGY                                                                                            | 17A |
| ◆ EDITORIAL VIEWS                                                                                                           |     |
| <b>Another Brick in (Some Kind of) Wall</b><br><i>J. Sleight</i>                                                            | 827 |
| <b>Network-level Mechanisms of Ketamine Anesthesia</b><br><i>G. A. Mashour</i>                                              | 830 |
| <b>Integration and Information: Anesthetic Unconsciousness Finds a New Bandwidth</b><br><i>A. E. Hudson and K. O. Pryor</i> | 832 |
| <b>Better Sleep in the Intensive Care Unit: Blue Pill or Red Pill... or No Pill?</b><br><i>R. L. Owens</i>                  | 835 |
| <b>Early Regional Inflammation: The Seeds of Lung Injury</b><br><i>M. Cereda and Y. Xin</i>                                 | 838 |
| <b>Potent Opioid Analgesia without Respiratory Depression: Could It Be Possible?</b><br><i>A. Dahan</i>                     | 841 |
| <b>Commentary on the Potential of the MOCA Minute Program</b><br><i>R. A. Bjork</i>                                         | 844 |

◆ Refers to This Month in Anesthesiology

◆ Refers to Editorial Views

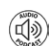

This article has an Audio Podcast

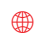

See Supplemental Digital Content

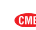

CME Article

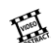

This article has a Video Abstract

## CONTENTS

### SPECIAL ARTICLES

- ◆ **Preclinical Pain Research: Can We Do Better?** 846  
*J. D. Clark*

Preclinical pain research has a poor record of translation into patient populations. The possible reasons and potential solutions are discussed.

- Sites Related to Crawford Williamson Long in Georgia** 850  
*K. J. Roddy, V. Starnes, and S. P. Desai*

Crawford Williamson Long remains an unsung pioneer. Detailed descriptions are provided of a museum that bears his name, Oconee Hill Cemetery where he and members of his family are buried, and other sites and artifacts associated with him.

### PERIOPERATIVE MEDICINE

#### CLINICAL SCIENCE

- ◆◆◆ **Neural Correlates of Sevoflurane-induced Unconsciousness Identified by Simultaneous Functional Magnetic Resonance Imaging and Electroencephalography** 861  
*A. Ranft, D. Golkowski, T. Kiel, V. Riedl, P. Kohl, G. Rohrer, J. Pientka, S. Berger, A. Thul, M. Maurer, C. Preibisch, C. Zimmer, G. A. Mashour, E. F. Kochs, D. Jordan, and R. Ilg*

Anesthetic concentrations of sevoflurane disrupted connectivity in higher order frontal and thalamic networks, but not in primary sensory networks, and reduced cortical information processing, similar to the effects observed for propofol. Intraoperative measurements of frontal electroencephalography might provide real-time intraoperative assessment of neurophysiologic correlates of anesthetic-induced unconsciousness.

- ◆◆◆ **Resting-state Network-specific Breakdown of Functional Connectivity during Ketamine Alteration of Consciousness in Volunteers** 873  
*V. Bonhomme, A. Vanhaudenhuyse, A. Demertzi, M.-A. Bruno, O. Jaquet, M. Ali Bahri, A. Plenevaux, M. Boly, P. Boveroux, A. Soddu, J. F. Brichant, P. Maquet, and S. Laureys*

In human volunteers, ketamine alters connectivity within and between resting-state consciousness networks, notably by disrupting frontoparietal connectivity while sensory and sensorimotor networks are preserved. While ketamine has certain distinct effects on connectivity within and between resting-state consciousness networks, its functional disruption of frontoparietal cortical communication is shared by several other general anesthetics with distinct pharmacologic profiles.

- ◆◆ **Distinct Cortical Signatures Associated with Sedation and Respiratory Rate Depression by Morphine in a Pediatric Population** 889  
*G. Montandon, S. L. Cushing, F. Campbell, E. J. Propst, R. L. Horner, and I. Narang*

Morphine reduced frontal high-frequency ( $\beta$ ) electroencephalography power and reduced frontal-occipital  $\beta$  coherence. Analgesic doses of morphine are associated with reduction in respiratory rate when accompanied by reduction in  $\beta$  power. These results indicate an effect of cortical arousal state per se in respiratory rate depression by morphine.

- ◆ **Reference Values for Noninvasive Blood Pressure in Children during Anesthesia: A Multicentered Retrospective Observational Cohort Study** 904  
*J. C. de Graaff, W. Pasma, S. van Buuren, J. J. Duijghuisen, O. O. Nafiu, S. Kheterpal, and W. A. van Klei*

The authors evaluated more than 116,000 children from 10 centers to determine blood pressure averages and ranges. The analysis was restricted to two periods: (1) after anesthetic induction but before incision and (2) a brief initial stable portion of surgery. Mean arterial pressure increased from about 40 mmHg at 1 month to 65 mmHg at 18 yr, with little difference in boys and girls.

- CME** **Unplanned, Postoperative Intubation in Pediatric Surgical Patients: Development and Validation of a Multivariable Prediction Model** 914  
*E. C. Cheon, H. L. Palac, K. H. Paik, J. Hajduk, G. S. De Oliveira, N. Jagannathan, and S. Suresh*

Of 87,920 patients of a quality improvement database, 540 children experienced unplanned postoperative intubation (UPI) within the first 30 postoperative days, and 178 events (0.2%) occurred within the first 72 h after surgery. Independent predictors of UPI within 72 h after surgery were operation time, severe cardiac risk factors, American Society of Anesthesiologists physical status classification more than 2, central nervous system tumor, developmental delay/impaired cognitive function, past or current malignancy, and neonate status. When children experienced a UPI, unadjusted 30-day mortality increased by over 11-fold.

## BASIC SCIENCE

- ◆◆ **Neural Correlates of Wakefulness, Sleep, and General Anesthesia: An Experimental Study in Rat** 929  
*D. Pal, B. H. Silverstein, H. Lee, and G. A. Mashour*

Disruption of cortical connectivity in the high  $\gamma$  band correlated with anesthetic- and sleep-induced unconsciousness, while  $\theta$  connectivity correlated with cholinergic tone and an activated cortex. Functional fragmentation of high-frequency activity in the cortex may be a common network-level mechanism of unconsciousness during general anesthesia and sleep.

- Sedative-hypnotic Binding to 11 $\beta$ -hydroxylase** 943  
*E. Pejo, X. Zhou, S. S. Husain, and D. E. Raines*

The *in vitro* dissociation constant of etomidate for 11 $\beta$ -hydroxylase is approximately 30 nM, which is nearly two orders of magnitude lower than its hypnotic concentration. Cyclopropyl methoxycarbonyl metomidate produces less adrenocortical suppression than etomidate because it is metabolized faster and binds to 11 $\beta$ -hydroxylase with lower affinity. The carboxylic acid metabolites of etomidate and cyclopropyl methoxycarbonyl metomidate bind to 11 $\beta$ -hydroxylase with affinities that are at most 1% that of their parent hypnotics. Carboetomidate, dexmedetomidine, ketamine, and propofol do not suppress adrenocortical function at hypnotic concentrations because they bind to 11 $\beta$ -hydroxylase with very low affinities.

- ◆ **Exposure of Stored Packed Erythrocytes to Nitric Oxide Prevents Transfusion-associated Pulmonary Hypertension** 952  
*S. Muenster, A. Beloiartsev, B. Yu, E. Du, S. Abidi, M. Dao, G. Fabry, J. A. Graw, M. Wepler, R. Malhotra, B. O. Fernandez, M. Feelisch, K. D. Bloch, D. B. Bloch, and W. M. Zapol*

In an ovine model, pretreatment of stored packed erythrocytes with nitric oxide before transfusion increases their survival after transfusion, prevents increases in pulmonary vascular resistance, and may provide a potential approach to mitigate adverse effects of stored erythrocyte transfusions.

- Enhanced Thalamic Spillover Inhibition during Non-rapid-eye-movement Sleep Triggers an Electrocortical Signature of Anesthetic Hypnosis** 964  
*L. Mesbah-Oskui and R. L. Horner*

Microperfusion of etomidate increased non-rapid-eye-movement  $\alpha$ - $\beta$  electrocortical activity and decreased wakefulness. The thalamus is implicated in triggering this increase in  $\alpha$ - $\beta$  frequency activity in the cortex during anesthetic hypnosis. The means by which thalamic activity coordinates cortical  $\alpha$ - $\beta$  activity in the cortex are not clear. The data suggest that the sedative properties of etomidate first lead to a non-rapid-eye-movement sleep state, followed by a spillover extrasynaptic  $\gamma$ -aminobutyric acid receptor type A-mediated inhibition in the thalamus, which then leads to thalamocortical oscillation in the  $\alpha$ - $\beta$  range.

## CRITICAL CARE MEDICINE

## CLINICAL SCIENCE

- ◆ **Low-dose Dexmedetomidine Improves Sleep Quality Pattern in Elderly Patients after Noncardiac Surgery in the Intensive Care Unit: A Pilot Randomized Controlled Trial** 979  
*X.-H. Wu, F. Cui, C. Zhang, Z.-T. Meng, D.-X. Wang, J. Ma, G.-F. Wang, S.-N. Zhu, and D. Ma*

In a pilot trial of 76 adults (age, greater than 65 yr) admitted to intensive care unit after noncardiac surgery, patients were randomized to receive low-dose dexmedetomidine infusion versus placebo for 15 h. Dexmedetomidine increased stage N2 (and decreased N1) sleep, total sleep time, sleep efficiency, and subjective sleep quality but caused hypotension.

## BASIC SCIENCE

- ◆◆● **Lung Metabolic Activation as an Early Biomarker of Acute Respiratory Distress Syndrome and Local Gene Expression Heterogeneity** 992

*T. J. Wellman, N. de Prost, M. Tucci, T. Winkler, R. M. Baron, P. Filipczak, B. Raby, J.-h. Chu, R. S. Harris, G. Musch, L. F. dos Reis Falcao, V. Capelozzi, J. G. Venegas, and M. F. Vidal Melo*

Sheep pretreated with endotoxin were ventilated and studied with computed tomographic and positron emission tomographic scans followed by lung biopsy. Metabolic activation preceded radiographic infiltration and was colocalized with gene activation and histologic injury. This provides rationale for therapies directed at metabolic or gene products in adult respiratory distress syndrome.

- **Vagus Nerve Attenuates Hepatocyte Apoptosis upon Ischemia–Reperfusion via  $\alpha 7$  Nicotinic Acetylcholine Receptor on Kupffer Cells in Mice** 1005

*M. Ni, H. Fu, F. Huang, T. Zhao, J.-K. Chen, D.-J. Li, and F.-M. Shen*

Using experimental models with hepatic vagotomized mice and Kupffer cell–eliminated mice, it was shown that the hepatic vagus nerve could minimize ischemia–reperfusion–induced liver apoptosis through activating  $\alpha 7$  nicotinic acetylcholine receptors on Kupffer cells, possibly by preventing their excessive production of reactive oxygen species.

## ■ PAIN MEDICINE

## BASIC SCIENCE

- ◆ **STR-324, a Stable Analog of Opiorphin, Causes Analgesia in Postoperative Pain by Activating Endogenous Opioid Receptor–dependent Pathways** 1017

*P. Sitbon, A. Van Elstraete, L. Hamdi, V. Juarez-Perez, J.-X. Mazoit, D. Benhamou, and C. Rougeot*

Opiorphin and STR-324 reduced mechanical hypersensitivity without adverse cardiorespiratory effects in a rat incisional pain model through opioid receptor–mediated mechanisms. Inhibitors of enkephalin breakdown represent a promising class of long-acting analgesics with improved side-effect profiles compared to direct opioid receptor agonists.

- AMPAkines Target the Nucleus Accumbens to Relieve Postoperative Pain** 1030

*C. Su, H. Y. Lin, R. Yang, D. Xu, M. Lee, N. Pawlak, M. Norcini, A. Sideris, E. Recio-Pinto, D. Huang, and J. Wang*

Systemic administration of an AMPAkin reduced pain and depression behavior. AMPAkin administration directly into the nucleus accumbens similarly reduced acute pain. The data suggest AMPAkin are novel analgesics for postoperative pain whose effect is mediated in part by activity in the nucleus accumbens.

## ■ EDUCATION

## IMAGES IN ANESTHESIOLOGY

- Child with Junctional Epidermolysis Bullosa, Hoarseness, and Nasal Obstruction Demonstrating Severe Laryngeal Stenosis** 1044

*L. A. Aronson*

- Harlequin Syndrome Associated with Multilevel Intercostal Nerve Block** 1045

*O. Viswanath, J. Wilson, and F. Hasty*

## ORIGINAL INVESTIGATIONS IN EDUCATION

- ◆◆● **Association between Participation in an Intensive Longitudinal Assessment Program and Performance on a Cognitive Examination in the Maintenance of Certification in Anesthesiology Program®** 1046

*H. Sun, Y. Zhou, D. J. Culley, C. A. Lien, A. E. Harman, and D. O. Warner*

More than 600 candidates for the cognitive examination enrolled in the Maintenance of Certification in Anesthesiology Minute Program® in 2014, and those individuals who enrolled and completed the activity scored higher on the cognitive examination, suggesting that the Maintenance of Certification in Anesthesiology Minute enhances learning.

## Redesign of the System for Evaluation of Teaching Qualities in Anesthesiology Residency Training (SETQ *Smart*)

1056

K. M. J. M. H. Lombarts, A. Ferguson, M. W. Hollmann, B. Mallng, SMART Collaborators, and O. A. Arah

System for Evaluation of Teaching Qualities *Smart* questionnaires were developed and validated for assessing teaching performance of faculty in residency training programs in different countries through a multicenter survey. System for Evaluation of Teaching Qualities *Smart* scores correlated with global ratings and yielded reliable feedback from three to five resident evaluations, thus providing a validated tool for international resident teaching assessment.

## MIND TO MIND

### Three Years after Their Vows

1066

L. D. Lawson

### A Resident Log: Nights

1068

A. Kore

## CORRESPONDENCE

### Ventilator-induced Lung Injury: Power to the Mechanical Power

1070

C. S. Samary, P. L. Silva, M. Gama de Abreu, P. Pelosi, and P. R. M. Rocco

### In Reply

M. Cressoni, C. Chiurazzi, and L. Gattinoni

### Is an Adductor Canal Block Really Better Than a Femoral Block for Anterior Cruciate Ligament Reconstruction?

1072

L. La Colla and J. E. Chelly

### In Reply

F. W. Abdallah and R. Brull

### Why Shouldn't *A Priori* Analysis Plans Be Publicly Available for *All* Observational Studies?

1074

A. Davidson and H. P. Grocott

### In Reply

J. C. Eisenach

### Is Tapered-cuff Shape a Risk Factor for Overinflation of Tracheal Cuff?

1075

A. Rouzé, G. Ledoux, E. Jaillette, and S. Nseir

### In Reply

A. Monsel, M. Le Corre, H. Brisson, C. Arbelot, C. Vezinet, M.-H. Fléron, Q. Lu, O. Langeron, and J.-J. Rouby

## ERRATUM

### Preoperative Evaluation Clinic Visit Is Associated with Decreased Risk of In-hospital Postoperative Mortality: Erratum

1078

### Effects of Volatile Anesthetics on Mortality and Postoperative Pulmonary and Other Complications in Patients Undergoing Surgery: A Systematic Review and Meta-analysis: Erratum

1078

## CAREERS & EVENTS

19A

## INSTRUCTIONS FOR AUTHORS

The most recently updated version of the Instructions for Authors is available at [www.anesthesiology.org](http://www.anesthesiology.org). Please refer to the Instructions for the preparation of any material for submission to ANESTHESIOLOGY.

Manuscripts submitted for consideration for publication must be submitted in electronic format. The preferred method is via the Journal's Web site (<http://www.anesthesiology.org>). Detailed directions for submissions and the most recent version of the Instructions for Authors can be found on the Web site (<http://www.anesthesiology.org>). Books and educational materials should be sent to Alan Jay Schwartz M.D., M.S.Ed., Director of Education, Department of Anesthesiology and Critical Care Medicine, The Children's Hospital of Philadelphia, 34th Street and Civic Center Blvd., Room 9327, Philadelphia, Pennsylvania 19104-4399. Requests for permission to duplicate materials published in ANESTHESIOLOGY should be submitted in electronic format, to the Permissions Department ([journalpermissions@lww.com](mailto:journalpermissions@lww.com)). Advertising and related correspondence should be addressed to Advertising Manager, ANESTHESIOLOGY, Wolters Kluwer Health, Inc., Two Commerce Square, 2001 Market Street, Philadelphia, Pennsylvania 19103 (Web site: <http://www.wkadcenter.com/>). Publication of an advertisement in ANESTHESIOLOGY does not constitute endorsement by the Society or Lippincott Williams & Wilkins, Inc. of the product or service described therein or of any representations made by the advertiser with respect to the product or service.

ANESTHESIOLOGY (ISSN 0003-3022) is published monthly by Wolters Kluwer Health, Inc., 14700 Citicorp Drive, Bldg 3, Hagerstown, MD 21742. Business office: Two Commerce Square, 2001 Market Street, Philadelphia, PA 19103. Periodicals postage paid at Hagerstown, MD, and at additional mailing offices. Copyright © 2016, the American Society of Anesthesiologists, Inc.

**Annual Subscription Rates:** *United States*—\$835 Individual, \$1714 Institution, \$335 In-training. *Rest of World*—\$881 Individual, \$1904 Institution, \$335 In-training. Single copy rate \$152. Subscriptions outside of North America must add \$53 for airfreight delivery. Add state sales tax, where applicable. The GST tax of 7% must be added to all orders shipped to Canada (Lippincott Williams & Wilkins' GST Identification #895524239, Publications Mail Agreement #1119672). Indicate in-training status and name of institution. Institution rates apply to libraries, hospitals, corporations, and partnerships of three or more individuals. Subscription prices outside the United States must be prepaid. Prices subject to change without notice. Subscriptions will begin with currently available issue unless otherwise requested. Visit us online at [www.lww.com](http://www.lww.com).

Individual and in-training subscription rates include print and access to the online version. Online-only subscriptions for individuals (\$285) and persons in training (\$285) are available to nonmembers and may be ordered by downloading a copy of the Online Subscription FAXback Form from the Web site, completing the information requested, and faxing the completed form to 301-223-2400/44 (0) 20 7981 0535. Institutional rates are for print only; online subscriptions are available via Ovid. Institutions can choose to purchase a print and online subscription together for a discounted rate. Institutions that wish to purchase a print subscription, please contact Wolters Kluwer Health, Inc., 14700 Citicorp Drive, Bldg 3, Hagerstown, MD 21742; phone: 1-800-638-3030 (outside the United States 301-223-2300/44 (0) 20 7981 0525); fax: 301-223-2400/44 (0) 20 7981 0535. Institutions that wish to purchase an online subscription or online with print, please contact the Ovid Regional Sales Office near you or visit [www.ovid.com/site/index.jsp](http://www.ovid.com/site/index.jsp) and select Contact and Locations.

**Address for non-member subscription information, orders, or change of address:** Wolters Kluwer Health, Inc., 14700 Citicorp Drive, Bldg 3, Hagerstown, MD 21742; phone: 1-800-638-3030 (outside the United States 301-223-2300/44 (0) 20 7981 0525); fax: 301-223-2400/44 (0) 20 7981 0535; email: [customerservice@lww.com](mailto:customerservice@lww.com). In Japan, contact LWW Japan Ltd., 3-23-14 Hongo, Bunkyo-ku, Tokyo 113, Japan; phone: 81-3-5689-5400; fax: 81-3-5689-5402; email: [bclaim@lww.co.jp](mailto:bclaim@lww.co.jp). In Bangladesh, India, Nepal, Pakistan, and Sri Lanka, contact Globe Publications Pvt. Ltd., B-13 3rd Floor, A Block, Shopping Complex, Naraina, Vihar, Ring Road, New Delhi 110028, India; phone: 91-11-25770411; fax: 91-11-25778876; email: [info@globepub.com](mailto:info@globepub.com).

**Address for member subscription information, orders, or change of address:** Members of the American Society of Anesthesiologists receive the print and online journal with their membership. To become a member or provide a change of address, please contact the American Society of Anesthesiologists, 1061 American Lane, Schaumburg, Illinois 60173-4973; phone: 847-825-5586; fax: 847-825-1692; email: [membership@ASAhq.org](mailto:membership@ASAhq.org). For all other membership inquiries, contact Wolters Kluwer Health, Inc., Customer Service Department, P.O. Box 1610, Hagerstown, MD 21740; phone: 1-800-638-3030 (outside the United States 301-223-2300/44 (0) 20 7981 0525); fax: 301-223-2400/44 (0) 20 7981 0535; email: [memberservice@lww.com](mailto:memberservice@lww.com).

**Postmaster:** Send address changes to ANESTHESIOLOGY, P.O. BOX 1610, Hagerstown, MD 21740.

**Advertising:** Please contact Ryan Magee, National Sales Manager, Product & Services Advertising, Journals and Websites, Wolters Kluwer Health, Inc., Lippincott Williams & Wilkins, Two Commerce Square, Philadelphia, PA 19103; tel: (215) 521-8804, fax: (215) 521-8801, e-mail: [Ryan.Magee@wolterskluwer.com](mailto:Ryan.Magee@wolterskluwer.com). For classified advertising: Joe Anzuena, Recruitment Advertising Representative, Wolters Kluwer Health, Inc., Lippincott Williams & Wilkins, Two Commerce Square, 2001 Market Street, Philadelphia, PA 19103; tel: (215) 521-8532, fax: (215) 701-2410. e-mail: [Joe.Anzuena@wolterskluwer.com](mailto:Joe.Anzuena@wolterskluwer.com).
